# Supplementary material
Source: publisher site journal article supplement (http://www.scielo.br/pdf/rmat/v22s1/1517-7076-rmat-22-suppl-e11937.pdf)
Supplement: Supplementary file 1 [file 1517-7076-rmat-22-suppl-e11937.pdf]

## A madeira laminada cruzada: aspectos tecnológicos, construtivos e de dimensionamento

### Cross laminated timber: technological, construction and dimensioning aspects

Silvia Teixeira Andrade Amorim<sup>1</sup>, Judy Norcka Rodo Mantilla<sup>2</sup>,  
Edgar Vladimiro Mantilla Carrasco<sup>2</sup>

<sup>1</sup> Departamento de Engenharia de Estruturas - DEES – Escola de Engenharia -UFMG, Belo Horizonte, MG

<sup>2</sup> PACPS - Escola de Arquitetura – UFMG, <sup>3</sup> Faculdade de Engenharia e Arquitetura, Universidade FUMEC  
e-mail: silvia.taa@hotmail.com; mantilla.carrasco@gmail.com

---

#### RESUMO

Os painéis de madeira laminada cruzada (CLT) são formados por lâminas de madeira com grandes dimensões arranjadas ortogonalmente e unidas com adesivo estrutural sob alta pressão. O sistema de laminação cruzada possibilita ao CLT trabalhar como um elemento estrutural rígido e autoportante. Além disso, são isolantes térmicos e acústicos e apresentam bom comportamento para situações de incêndio. São utilizados como elementos estruturais e de fechamento em edificações de vários pavimentos em construções pré-fabricadas e este sistema construtivo pode ser considerado mais sustentável, que gera menos impactos ao meio ambiente, frente às soluções tradicionais brasileiras. A madeira é um recurso natural renovável e quando utilizada na construção, cumpre um papel importante para o meio ambiente: armazenar o CO<sub>2</sub> e utilizar baixa energia para sua manufatura e aplicação quando comparada aos materiais convencionais empregados na construção como o aço, o concreto e o alumínio. Para o dimensionamento dessas estruturas ainda não existe uma abordagem de cálculo universalmente aceita pelos projetistas e fabricantes de CLT. Neste trabalho, são dimensionados os painéis de CLT do tipo lajes de piso ou cobertura sujeitos à flexão a partir dos principais métodos de dimensionamento. Os resultados obtidos foram comparados e constatou-se que o método de maior precisão foi o que considerou a rigidez estrutural de todas as lâminas. A maior precisão no projeto e dimensionamento dos painéis de CLT contribui para uma engenharia sustentável, na medida em que otimiza o uso do material na estrutura.

**Palavras-chave:** Madeira laminada cruzada, sistemas construtivos, sustentabilidade.

---

#### ABSTRACT

Cross laminated timber panels (CLT) are formed by large-sized orthogonally arranged wood layers bonded with structural adhesive under high pressure. The cross-lamination system provides to the CLT to work as a rigid and self-supporting structural element. In addition, they are thermal and acoustic insulation and have a good resistance in fire situations. They are used as structural and closing elements in multi-floor constructions and this constructive system can be considered more sustainable, which generates less impact to the environment, compared to traditional Brazilian solutions. Wood is a renewable natural resource and when used in construction it plays an important role for the environment: storing CO<sub>2</sub> and using low energy for its manufacture and application when compared to conventional materials used in construction such as steel, concrete and aluminum. In these structures design there is still no universally accepted analytic approach by CLT designers and manufacturers. In this work, the CLT panels used as floor or roof slabs subject to bending are dimensioned the most important methods used. The results were compared and it was concluded that the more accurate methods consider the rigidity and structural resistance of all layers. Greater precision in the designing of the CLT panels contributes to sustainable engineering as it optimizes the use of the material in the structure.

**Keywords:** Cross Laminated Timber, construction systems, sustainability.

## 1. INTRODUÇÃO

Os edifícios altos podem ser projetados e construídos com estruturas de madeira a partir de uma nova abordagem estrutural que utiliza painéis do tipo madeira laminada cruzada (Cross Laminated Timber - CLT). Formados por lâminas de madeira de grandes dimensões e de espécies resinosas arrançadas ortogonalmente e unidas com adesivo estrutural sob alta pressão, são elementos pré-fabricados de dimensões variáveis conforme as condições de produção, logística de transporte e função a desempenhar, como em Brandner et al. [1].

A aplicação do CLT nos edifícios se iniciou nos anos 90 na Áustria e Suíça, conforme Breneman [2]. Nos últimos 20 anos a aplicação dos painéis de CLT em edifícios de múltiplos pavimentos vem aumentando e os países que lideram o uso de CLT atualmente são Áustria, Alemanha, Suíça, Suécia, Noruega e Reino Unido.

As normas técnicas vêm incorporando este produto (ANSI/APA 2012 PRG 320; DIN 2004; EN2004 [3]), além de manuais de utilização como IFP Innovation Handbook [4] e a Norma técnica europeia [5].

O comportamento mecânico dos painéis de CLT é complexo, principalmente devido à ortogonalidade em relação à direção das fibras dos painéis consecutivos, além da anisotropia inerente à madeira. No dimensionamento das estruturas ainda não existe uma abordagem de cálculo universalmente aceita pelos pesquisadores, projetistas e fabricantes de CLT.

Para os painéis de CLT sujeitos a carregamentos perpendiculares ao plano, como lajes de piso e coberturas de edificações, diversas teorias e métodos analíticos de dimensionamento vem sendo propostas e testadas. Algumas delas já foram incorporadas às normas técnicas de dimensionamento (DIN 2004; EN2004 [3]). Essas teorias se baseiam na determinação da rigidez efetiva à flexão e ao cisalhamento da peça, de acordo com a configuração geométrica dos painéis, espessura e direção das fibras da madeira. Determina-se um modelo de painel equivalente como uma hipótese simplificada para tratar o comportamento do painel à flexão. De acordo com Thiel e Schickhofer [6], em 1999 Kreuzinger propôs o método Shear Analogy para o dimensionamento de lajes de CLT e em 2003 Blass e Gortlacher propuseram o método Gama ou “Mechanically jointed beams theory”, sendo este uma adaptação do anexo B do Eurocódigo 5 [3]. Outro método proposto foi o k-method conforme Blass e Fellmoser [7]. Segundo Franzoni et al. [8] estes são os três principais métodos de cálculo das estruturas de CLT utilizadas como placas de cobertura ou de piso sujeitos a esforços de flexão.

Neste trabalho são apresentadas as características do material, seus aspectos tecnológicos e construtivos e o dimensionamento de lajes de CLT. São comparados os métodos analíticos utilizados no dimensionamento de lajes de CLT sujeitas à flexão no Estado Limite Último de resistência à flexão verificando o nível de precisão e confiabilidade de cada uma dessas teorias.

## 2. MATERIAIS E MÉTODOS

Os painéis de CLT, formados por lâminas de madeira sobrepostas de forma cruzada, são constituídos de espécies resinosas do tipo pinho [1]. Nesses painéis a disposição ortogonal das lâminas de madeira, conforme mostrado na Figura 1, proporciona estabilidade dimensional ao painel, pois garante uma isotropia em termos de suportar as cargas em várias direções. Assim ele trabalha como um elemento rígido e autoportante, sendo variável o número de lâminas conforme a função a desempenhar, sendo estrutural ou utilizado para a vedação da edificação. Como elementos estruturais são utilizados em edificações de vários pavimentos em construções pré-fabricadas, ou em tabuleiro de estruturas de pontes, e podem ser dispostos tanto no sentido vertical como horizontal, conforme mostra a Figura 1.

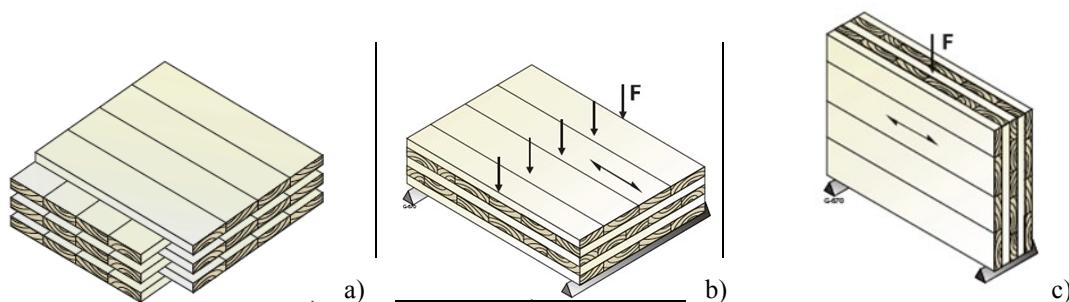

**Figura 1:** CLT: a) Disposição ortogonal das lâminas de madeira nos painéis de CLT, b) Painel sujeito à flexão no sentido horizontal e c) Painel no sentido vertical. Fonte: [4].

O sistema construtivo em CLT possui baixo índice de resistência/peso sendo por isso uma tecnologia eficiente quanto à esbeltez e leveza da edificação, [9].

Devido à baixa condutividade térmica da madeira esses painéis são isolantes térmicos e pode então proporcionar eficiência energética dos edifícios na fase de operação. Além disso, possuem bom isolamento acústico e adequada resistência ao fogo, [9].

Os edifícios em CLT começam a ser construídos na fábrica sendo que primeiramente é feita a secagem e tratamento biológico da madeira contra organismos xilófagos. As peças são cortadas e classificadas quanto à presença de discontinuidades, fissuras e nós. Em seguida, elas são arrançadas de forma a empregar as de melhor qualidade nas camadas de maior solicitação estrutural. Aplica-se o adesivo estrutural à base de poliuretano e em seguida a prensagem e o tempo de cura é de aproximadamente 24 horas. O acabamento das placas de madeira é feito com plainas e lixas. As peças são recortadas em fábrica e devem atender as especificações de projeto para os vãos (janelas e portas) e para deixar o espaço para passagem de instalações mecânicas e elétricas, [10].

A dimensão dos painéis varia de acordo com o tamanho das prensas utilizadas na fabricação e está limitada aos meios de transporte, e no Brasil, segundo Carla et al. [10] o comprimento máximo é de 14m e uma largura máxima de 2,6m. A espessura dos painéis depende da especificação de projeto e eles são unidos com adesivo estrutural à base poliuretano e as juntas de extremidade são geralmente do tipo *finger joint* (junta dentada).

Esses painéis em geral geram menos impactos ao meio ambiente, frente às soluções construtivas tradicionais de aço ou concreto, já que utilizam como matéria prima a madeira, um recurso natural renovável que armazena o CO<sub>2</sub> por um longo período de tempo, a vida útil da estrutura. Essa hipótese foi estudada e confirmada nos trabalhos de Robertson et al. [11] e Börjesson e Gustavsson [12] que fazem as Análises de Ciclo de Vida (ACV) quantificando e comparando os impactos ambientais entre os diferentes sistemas construtivos, convencionais e em CLT. Além disso, o CLT utiliza baixa energia para sua manufatura e aplicação, [13].

### 3. ASPECTOS CONSTRUTIVOS

O sistema construtivo para edificações que utiliza os painéis de CLT é caracterizado pelo alto grau de industrialização, alta precisão e velocidade de montagem, e baixa geração de resíduos na obra, conforme [1].

Os painéis produzidos na fábrica são transportados para o canteiro de obras, com vãos (janelas e portas) e espaço para passagem de instalações previamente recortados, como descrito na seção anterior. As instalações prediais podem então ser embutidas em canaletas no painel em CLT ou mesmo podem ser externas a eles em eletrodutos aparentes no ambiente construído. No caso de haver uma grande quantidade de canaletas, a resistência da parede pode ser significativamente reduzida e portanto essas canaletas devem ser consideradas no cálculo estrutural. Além disso, deve-se evitar a passagem de instalações nos painéis que dividem apartamentos, devido à redução do isolamento acústico.

No transporte até o canteiro de obras e durante a montagem e instalação em obra, os painéis devem ser protegidos contra a umidade para evitar a variação de suas dimensões além de descoloração, ou sujidades, conforme o fabricante austríaco [14].

Com o auxílio de guindastes, os elementos são içados até sua posição definitiva na edificação e a ligação entre os painéis é realizada por sistemas de fixação mecânica, utilizando-se conectores metálicos, parafusos, cantoneiras, etc. Essas ligações são detalhadas na fase de projeto da edificação.

O CLT não pode estar em contato com o solo, devido à umidade ascendente, assim pode-se utilizar mantas impermeabilizantes ou fundações de outro tipo de material para receber a superestrutura em CLT. O painel de CLT de cobertura da edificação também deve estar protegido com material impermeável à água, mas que permita a passagem de ar.

Na fase de planejamento da construção, a logística de transporte, o local de armazenamento dos painéis e a área de manuseio dos mesmos devem ser considerados, dadas as dimensões dos painéis, [14].

### 4. DIMENSIONAMENTO

Os painéis de CLT dispostos horizontalmente que funcionam como lajes de piso ou cobertura estão sujeitos à cargas verticais e portanto ao esforço de flexão.

A capacidade resistente dos painéis de CLT sujeitos à flexão é influenciada pelo tipo de madeira, pela ordem da disposição das lâminas do painel, além da deformação de cisalhamento entre elas chamada *rolling shear*. A Figura 2 mostra um elemento de CLT sujeito à tensão de cisalhamento, resultante do esforço de flexão, pela aplicação das cargas perpendiculares ao plano, como mostrado na Figura 1, na letra b. As lâminas transversais sofrem a deformação do tipo *rolling shear*. Devido à baixa rigidez a este tipo de esforço de

cisalhamento,  $G_{rolling\ shear}$ , sendo ele 10 vezes menor que a rigidez transversal das lâminas longitudinais, a deformação da seção transversal é causada quase exclusivamente pela deformação das fibras transversais. Essa deformação é considerada então nos métodos de dimensionamento das placas sujeitas à flexão.

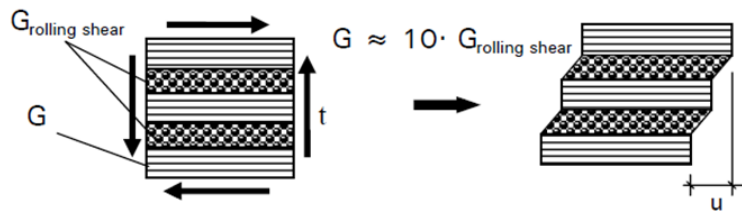

**Figura 2:** Deformação de cisalhamento do elemento de CLT. Fonte: [4]

Neste trabalho são estudadas três configurações distintas de lajes de CLT sujeitas à flexão dimensionadas através de quatro métodos de cálculo empregados, atualmente, por projetistas e fabricantes. São eles: o Método Gama que é uma adaptação do anexo B do Eurocódigo 5, o Método K da teoria dos materiais compostos, o método *Shear Analogy* e o método simplificado empregado na norma canadense *O86-14 - Engineering design in wood* descrito em [4].

São utilizados como referência de solução exata para os cálculos realizados neste estudo os valores experimentais encontrados no trabalho de Christovasilis et al. [15]. Os valores de resistência à flexão foram obtidos dos ensaios experimentais do tipo flexão em quatro pontos em vigas de CLT constituídas de madeira de pinus [*Picea abies*], cujo módulo de elasticidade longitudinal era de  $E=11000\text{MPa}$  e a resistência à flexão característica valia de  $f_b=24\text{MPa}$ .

Apesar dos painéis serem elementos estruturais bidimensionais e resistirem à flexão nas duas direções, na prática, quando são utilizados como lajes de piso ou cobertura sua largura máxima é de aproximadamente 2,5m e esta dimensão é muito inferior ao comprimento da peça e trabalham como se fossem elementos de vigas, uniaxiais. No trabalho de Christovasilis et al. [15], foram ensaiadas vigas de CLT que representavam lajes com uma direção principal.

São consideradas três configurações diferentes de painéis de CLT de três e sete camadas e vão corresponde a 18 vezes a altura  $h$  de cada painel, sendo eles 1026, 2340 e 5400mm. A Figura 3 abaixo mostra o desenho esquemático dos painéis dimensionados.

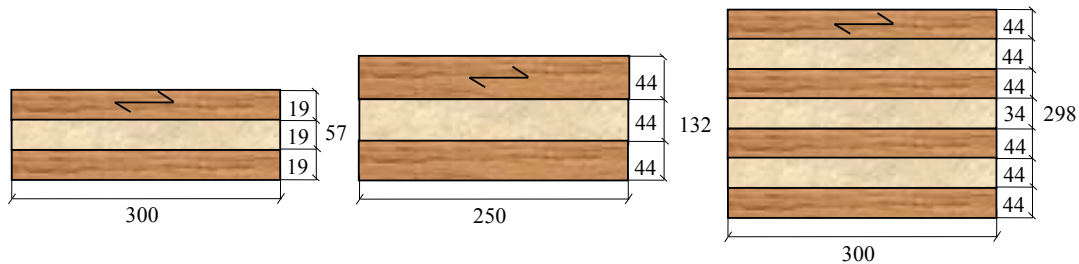

**Figura 3:** Geometria dos painéis de CLT em (mm). Fonte: Elaborado pela autora.

No dimensionamento da placa de CLT sujeita à flexão verifica-se se a resistência característica da peça é maior que a  $\sigma$  tensão aplicada à estrutura da placa de CLT, dada pela Equação 1.

$$\sigma = \frac{M}{I_{eff}} z \tag{1}$$

Onde  $M$  é o momento fletor resistente,  $I_{eff}$  o momento de inércia efetivo da placa de CLT, em relação ao momento de inércia  $I$  equivalente para uma seção maciça que varia conforme o método de cálculo e  $z$  a distância da superfície do painel à linha neutra.

A seguir são brevemente descritos os métodos de cálculo estudados.

#### 4.1 Método Gama ou “Mechanically jointed beams theory”

O Método Gama ou “Mechanically jointed beams theory” consiste em uma adaptação do anexo B do Eurocódigo 5 [3] para as estruturas de CLT. O dimensionamento é realizado considerando a inércia efetiva, similar aos cálculos para as vigas compostas na forma de perfis I ou perfis T [3].

No cálculo da inércia efetiva, determina-se o fator de eficiência da conexão gama  $\gamma$  adaptado ao CLT, que corresponde ao nível de solidarização entre as laminas longitudinais e as laminas dispostas transversalmente. O fator gama  $\gamma$  vale 1 caso os painéis estejam completamente colados ou 0 caso contrário. A equação da rigidez efetiva do EC5 [3] considera a deformação de cisalhamento, *rolling shear*, que provoca uma deformação global na junção entre os painéis de madeira e está mostrada na Equação 2.

$$EI_{eff} = \sum E_i I_i + \gamma_i E_i A_i z_i^2 \quad (2)$$

Sendo  $E_i$  o módulo de elasticidade paralelo às fibras da madeira de cada uma das lâminas dispostas longitudinalmente,  $b_i$  é a largura da lamina,  $h_i$  a espessura,  $z_i$  a distância do centróide da lâmina  $i$  ao centróide da seção transversal e  $\gamma_i$  é o fator de eficiência da conexão. O módulo de elasticidade das lâminas transversais é considerado zero neste método.

O momento resistente  $M$  é calculado conforme a Equação 3, para o módulo de elasticidade longitudinal sendo o mesmo em todas as camadas do painel:

$$M = F_b \cdot \frac{I_{eff}}{(\gamma_1 a_1 + 0.5 \cdot h)} \quad (3)$$

Sendo  $F_b$  o coeficiente de resistência à flexão característica e  $a_1$  a distância do centroide da primeira lâmina até a linha neutra.

#### 4.2 Método K ou “Composite Theory” da teoria dos materiais compostos

Este método é baseado na teoria dos materiais compósitos e considera no dimensionamento da placa a rigidez e resistência de cada lâmina longitudinal ou transversal que constitui o painel de CLT.

A rigidez e resistência das camadas individuais são incorporadas ao cálculo a partir de um fator de composição  $K_i$ . Este fator de composição  $K_i$  é determinado conforme o tipo de carregamento e a orientação das placas de CLT. A Equação 4 mostra o cálculo da rigidez efetiva para a configuração do painel em estudo e sujeito à flexão:

$$EI_{eff} = E \cdot I \cdot K_1 \quad (4)$$

Sendo  $E$  o módulo de elasticidade paralelo às fibras das camadas do painel de CLT e  $K_1$  o fator de composição para a geometria do problema em análise que varia conforme a disposição das lâminas do painel, sua espessura e módulos de elasticidade e do tipo de carregamento, conforme [7].

#### 4.3 Método *Shear Analogy* (Kreuzinger)

O modelo de cálculo *Shear Analogy*, descrito em [4], divide a viga estudada em duas vigas virtuais posicionadas em suas extremidades para a homogeneização da seção transversal que consideram diferentes propriedades. A primeira considera a rigidez à flexão de cada uma das lâminas da placa de CLT, com rigidez ao cisalhamento infinita já que em cada lâmina individual não existe tensão de cisalhamento. A segunda viga virtual considera a tensão de cisalhamento entre as camadas.

A rigidez efetiva é dada pela expressão:

$$EI_{eff} = \sum E_i \cdot I_i + E_i \cdot A_i \cdot z_i^2 \quad (5)$$

Sendo a primeira parcela correspondente à primeira viga e a segunda à segunda viga virtual.

Os módulos de elasticidade transversal e longitudinal para todas as camadas do painel. A rigidez das camadas transversais é dada por  $E_{90}=E/30$  assim como no método K.

#### 4.4 Norma canadense O86-14

Esse método corresponde a uma simplificação do método Gama explicado acima neste trabalho conforme [4]. O momento resistente,  $M$ , é calculado através da Equação 8.

$$M = F_b \cdot \frac{I_{eff}}{0.5.h} \quad (8)$$

Sendo que a inércia efetiva  $I_{eff}$  é calculada conforme o método Gama.

## 5. RESULTADOS E DISCUSSÃO

Para as três configurações de vigas de CLT calculadas no trabalho apresenta-se o gráfico do percentual de erro em relação à solução obtida do trabalho experimental de Christovasilis et al. [15], na Figura 4.

Em Christovasilis et al. [15], os valores obtidos para o momento resistente foi medido na ocorrência da primeira trinca da viga, e seus resultados foram de 6kN.m, 19.4kN.m e 115kN.m para o painel de 57x300mm, o painel de 132x250mm e o de 298x300mm respectivamente. Cada um desses valores foi multiplicado por um coeficiente 2/3 para obtenção do valor do limite de elasticidade na flexão da peça, já que os métodos de dimensionamento são válidos apenas no regime elástico. Os valores do momento no limite de elasticidade das vigas podem assim ser comparados com os valores calculados nos métodos de dimensionamento.

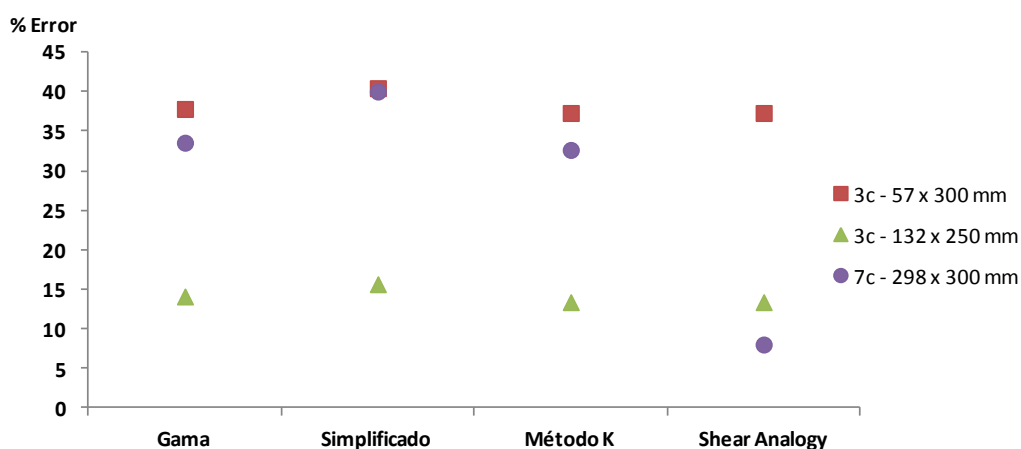

Figura 4: Porcentagem de erro dos métodos de dimensionamento para os painéis de CLT.

Os valores para os momentos resistentes encontrados nos métodos de cálculo foram inferiores aos valores de referência de Christovasilis et al. [15] e a porcentagem de erro variou entre 0,5 e 30%, conforme o gráfico da Figura 4.

Conforme o gráfico da Figura 4, os percentuais de erros entre os métodos de dimensionamento não apresentaram diferenças expressivas. Para a placa de 3 camadas e menor espessura a diferença entre a maior porcentagem de erro, o método simplificado (11%) e o menor *shear analogy* (2%) foi de 9%.

O painel de três lâminas de madeira e 57 mm de altura obteve uma boa precisão para todos os métodos de dimensionamento além do percentual de erro entre os diferentes métodos de cálculo não ter variado significativamente. Já para o painel de três camadas e menor altura, de 132 mm, o erro percentual ficou entre 15% e 30% o que necessitaria a inclusão de um coeficiente de segurança no seu dimensionamento para esta espessura de painel, e uma investigação mais aprofundada para explicar esses resultados.

Para a viga de maior altura de dimensões da seção transversal de 298x300mm, o método mais preciso foi o *Shear Analogy*. Verificando-se que o método que leva em consideração as deformações de cisalhamento entre as laminas do painel apresenta melhores resultados.

No geral nota-se que o método *Shear Analogy* corresponderia ao método com menor percentual de erro em relação à situação real e em seguida estaria o método K. Ambos os métodos incorporam a resistência e rigidez de todas as fibras na resistência do painel de CLT.

## 6. CONCLUSÕES

No trabalho foi apresentada a nova tecnologia estrutural, o CLT, para ser aplicada em edifícios altos, suas características e metodologia construtiva. Segundo a revisão bibliográfica apresentada neste trabalho, o CLT pode ser considerado um sistema construtivo viável e mais sustentável para os edifícios altos.

A utilização da madeira na construção cumpre um papel importante para o meio ambiente já que ar-

mazena o CO<sub>2</sub> aumentando o sequestro de carbono do planeta durante a vida útil da edificação.

Foram apresentados os métodos de cálculo usuais para os painéis de CLT sujeitos à flexão e calculados os painéis de CLT comparando os resultados obtidos com os experimentais encontrados na literatura.

Pela comparação dos métodos de dimensionamento constatou-se que o método de maior precisão foi o que considerou a rigidez de todas as lâminas da placa de CLT além de considerar também as deformações de cisalhamento, o método *Shear Analogy*.

## 7. BIBLIOGRAFIA

- [1] BRANDNER, R., FLATSCHER, G., RINGHOFER, A., *et al.*, “Cross laminated timber (CLT): overview and development,” *Eur. J. Wood Wood Prod.*, v. 74, n. 3, pp. 331–351, 2016.
- [2] BRENEMAN, S. “A State of the Art Review of Cross-Laminated Timber Floor Systems”, In: SEAOC 2014 Convention Proceedings, pp. 1–5, 2014.
- [3] EN 1995-1-1: Eurocode 5, “Design of timber structures. Part 1-1: General Common rules and rules for buildings”, Design, pp. 1–123, 2004.
- [4] GAGNON, S., PIRVU, C. *CLT handbook: cross-laminated timber*, FPInnovations Québec, 2011.
- [5] “ETA-11/0295 - European Technical Approval,” Three-dimensional nailing plate (joist end connector for wood to wood connections and wood to concrete or steel connections)., December 1988. Danmark, pp. 1–43, 2013.
- [6] THIEL, A., SCHICKHOFER, G. “CLTdesigner – A software tool for designing cross laminated timber elements: 1D-plate- design”, In: Proceedings WCTE 2010 – world conference on timber engineering, pp. 235–241, 2010.
- [7] BLASS, H. J., FELLMOSE, D. P. “Design of solid wood panels with cross layers”, In: Proceedings WCTE 2004 - World Conference on Timber Engineering, pp. 543–548, 2004.
- [8] FRANZONI, L., LEBÉE, A., LYON, F. “Influence of orientation and number of layers on the elastic response and failure modes on CLT floors: modeling and parameter studies”, *Eur. J. Wood Wood Prod.*, v. 74, n. 5, pp. 671–684, 2016.
- [9] JORGE, L. “Edifícios construídos com painéis de madeira lamelada-colada cruzada”, In: Seminário Casas de Madeira, pp. 103–116, 2013.
- [10] SILVA, C.A., CHIRINÉA, M. L. B., BARROS, M. M. S. B. “Cross Laminated Timber (CLT): Uma tecnologia viável no Brasil?”, In: *XVI Encontro Nacional de Tecnologia do Ambiente Construído - ENTAC*, pp. 5467–5477, 2016.
- [11] ROBERTSON, A.B., LAM, F. C. F., COLE, R.J. “A Comparative Cradle-to-Gate Life Cycle Assessment of Mid-Rise Office Building Construction Alternatives: Laminated Timber or Reinforced Concrete”, *Buildings*, v. 2, n. 3, pp. 245–270, 2012.
- [12] BÖRJESSON, P., GUSTAVSSON, L. “Greenhouse gas balances in building construction: wood versus concrete from life-cycle and forest land-use perspectives”, *Energy Policy*, v. 28, n. 9, pp. 575–588, Jul. 2000.
- [13] FALK, B. “Wood as a sustainable building material”, *For. Prod. J.*, v. 52, n. 1, pp. 6–12, 2009.
- [14] KLH, “Assembly and Installation.” KLH Massivholz GmbH, p. 28, 2012.
- [15] CHRISTOVASILIS, I. P., BRUNETTI, M., FOLLESA, M., *et al.*, “Evaluation of the mechanical properties of cross laminated timber with elementary beam theories”, *Constr. Build. Mater.*, v. 122, pp. 202–213, 2016.
